# Supplementary material for: Facile preparation of a hydrophilic magnetic hybrid nanomaterial with solid-phase extraction capability for highly efficient enrichment of phthalates in environmental water
Source: Royal Society of Chemistry journal article supplement (doi:10.1039/c8ay00883c), 2018-01-01
Supplement: c8ay00883c1.pdf [file c8ay00883c1.pdf]

# Facile Preparation of a Hydrophilic Magnetic Solid-Phase Extraction Hybrid Nanomaterial for Highly Efficient Enrichment of Phthalates in Environmental Water

Yinghua Yan\*, Yujie Lu, Baichun Wang, Yiqian Gao, Jiawen Ge, Hongze Liang\*, Dapeng Wu

School of Materials Science and Chemical Engineering, Ningbo University, Ningbo 315211, China

\*Corresponding author: Yinghua Yan, Prof. Hongze Liang

E-mail: [yanyinghua@nbu.edu.cn](mailto:yanyinghua@nbu.edu.cn), [lianghongze@nbu.edu.cn](mailto:lianghongze@nbu.edu.cn)

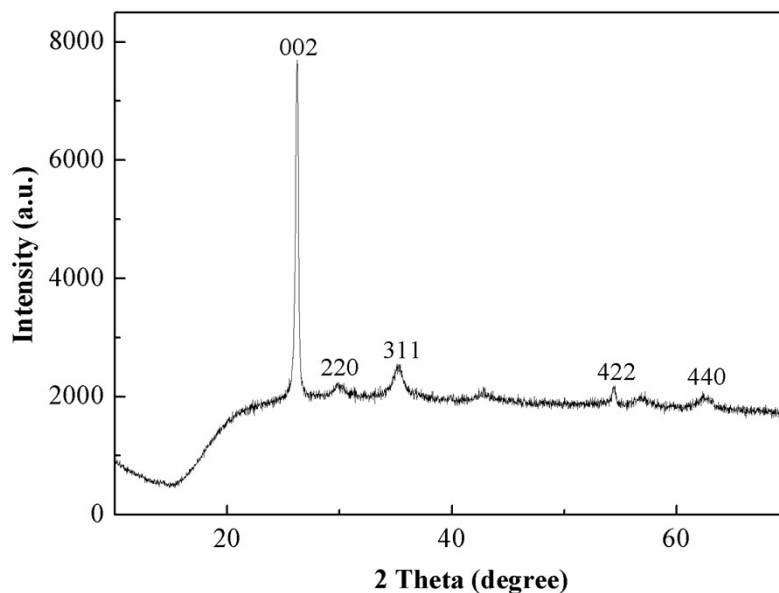

**Fig. S1.** Wide angle XRD pattern of magG@PDA@C<sub>18</sub>.

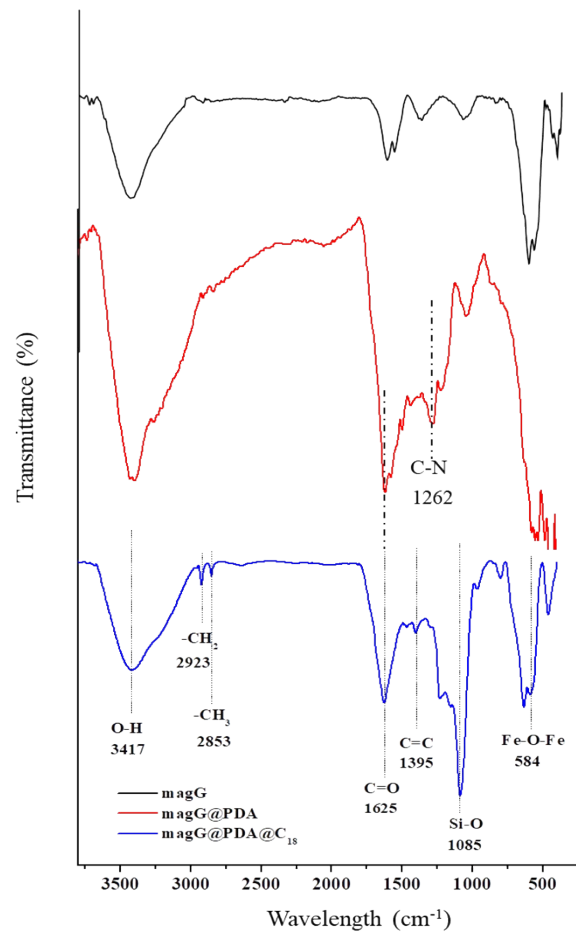

**Fig. S2.** FT-IR spectra of magG, magG@PDA, magG@PDA@C<sub>18</sub>.

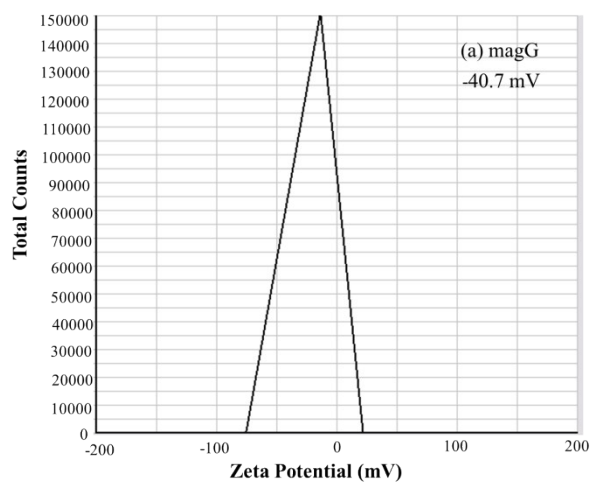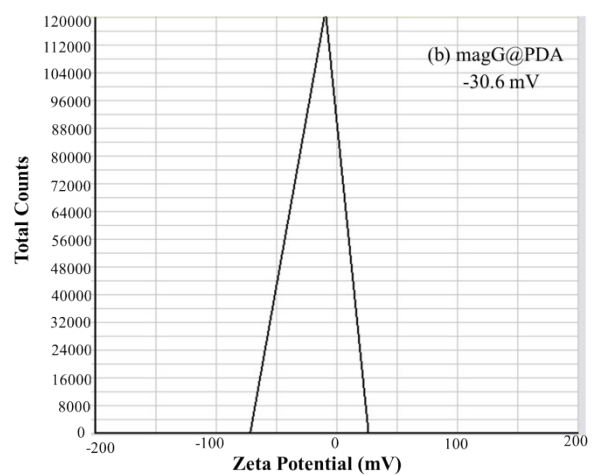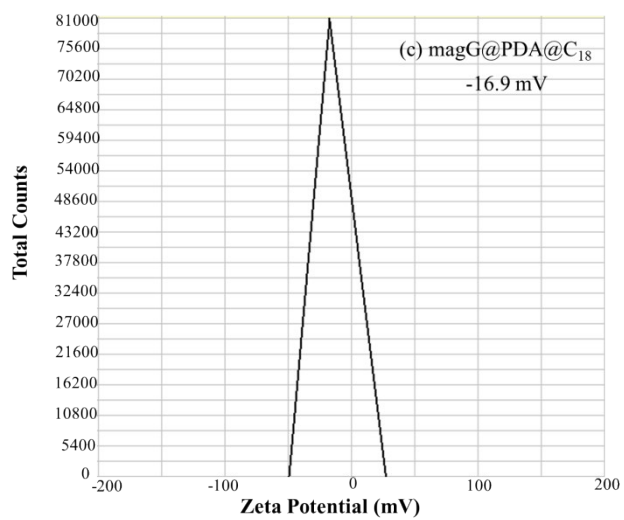

**Fig. S3.** Zeta potential distributions of (a) magG, (b) magG@PDA and (c) magG@PDA@C<sub>18</sub>.

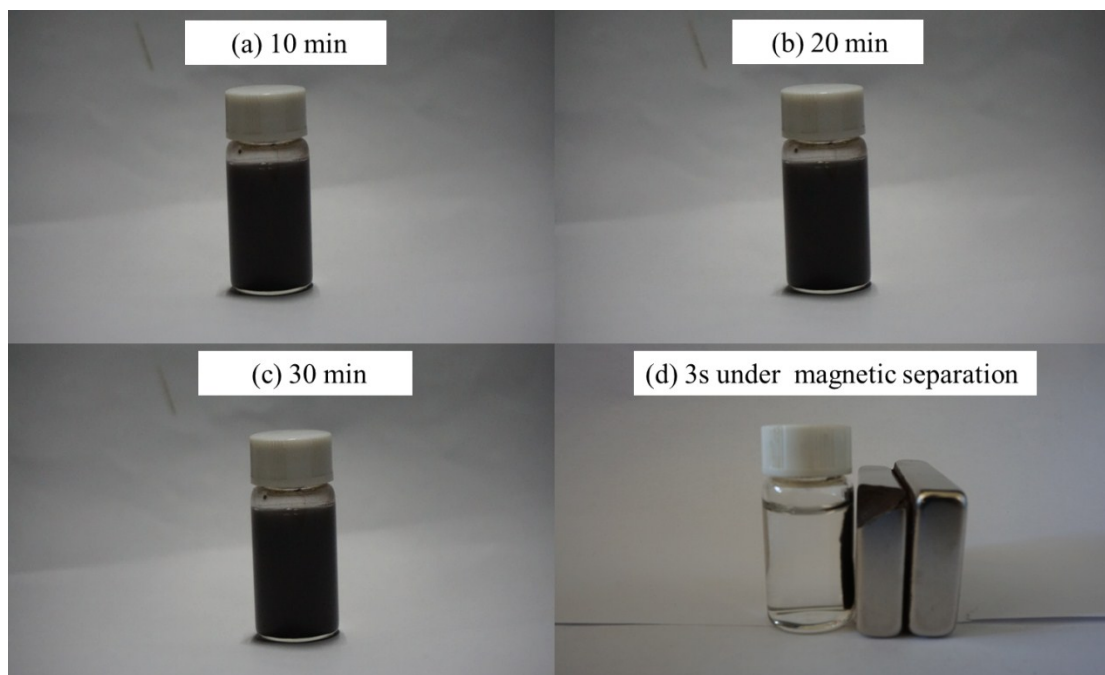

**Fig. S4.** magG@PDA@C<sub>18</sub> dispersion in water solution: (a) 10 min, (b) 20 min, (c) 30 min, and (d) 3 s under magnetic separation.
